# Supplementary material
Source: publisher figshare collection journal article supplement (https://geolsoc.figshare.com/ndownloader/files/9070183)
Supplement: Supplementary file 1 [file 9070183]

**GPS coordinates sites 1-22**

**Site**

1. **between S 20°57.661’ E 120°12.452’- S20°57.782’ E 120°12.604’**
2. **S 20°57.907’ E 120°14.707’**
3. **S 20°57.239’ E 120°14.758’**
4. **S 20°56.215’ E 120°13.166’**
5. **between S 20°53.385’ E 120°08.633’- S20°54.381’ E 120°11.388’**
6. **between S 20°53.643’ E 120°02.321’- S20°53.803’ E 120°05.330’**
7. **a. S 20°55.284’ E 119°56.876’; b. S20°54.617’ E 119°59.018**
8. **S 20°56.712’ E 119°55.679’**
9. **S 20°57.144’ E 119°53.928’**
10. **a. S 20°55.267’ E 119°46.617’; b. S 20°55.264’ E 119°48.245’; c. S 20°56.401’ E 119°47.419’**
11. **between S 20°56.711’ E 119°59.475’- S20°56.551’ E 119°57.760’**
12. **between S 20°59.361’ E 119°50.724’- S20°59.376’ E 119°50.828’,**
13. **S 20°59.672’ E 119°50.258’**
14. **S 21°00.355’ E 119°49.227’**
15. **between S 21°01.064’ E 119°47.896’- S21°01.098’ E 119°47.930’,**
16. **a. S21°06.985’ E 119°48.093’; b. S21°05.797’ E 119°46.506’**
17. **S 21°11.179’ E 119°42.697’**
18. **between S 21°16.513’ E 119°24.822’ - S 21°15.703’ E 119°25.174’**
19. **S 21°12.417’ E 119°23.372**
20. **between S 21°04.901’ E 119°26.499’ - S21°12.811’ E 119°22.484’**
21. **a. S 21°02.998’ E 119°27.247’; b. S 21°02.411’ E 119°27364’; c. between S 21°00.506’ E 119°28.403’ - S21°02.139’ E 119°30.944’**
22. **S 21°06.078’ E 119°28.755’**
